# Supplementary material for: Population structure in Quercus suber L. revealed by nuclear microsatellite markers
Source: PeerJ journal article supplement (doi:10.7717/peerj.13565), 2022-06-16
Supplement: Fig_S1.pdf [file Fig_S1.pdf]

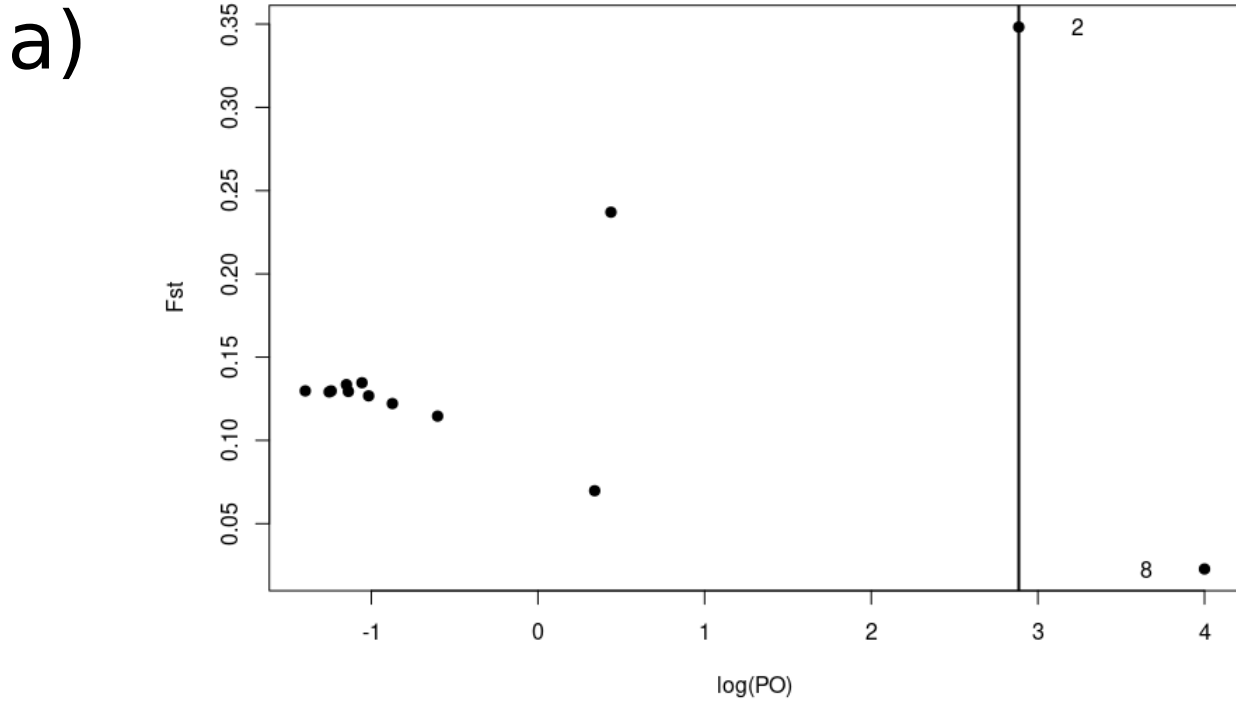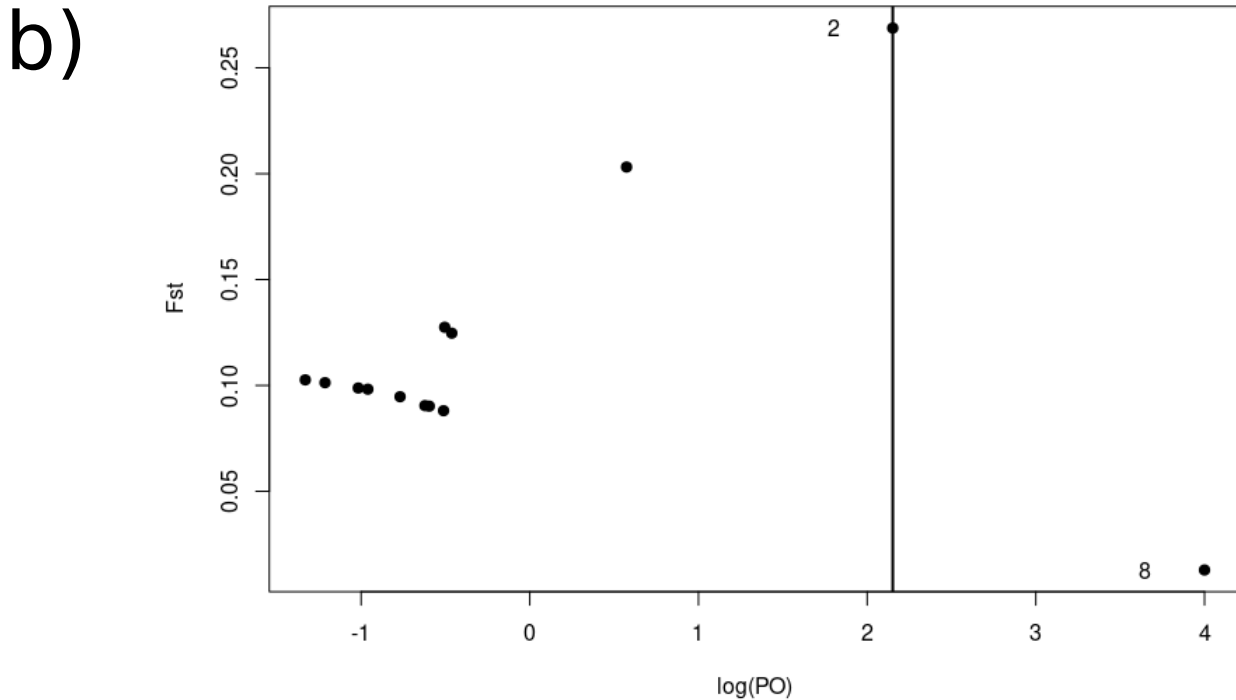

**Figure S1: Tests on non-neutrality**

Plots of the BAYESCAN tests of locus non-neutrality for  $K=2$  (a) and  $K=3$  (b) with neutrality prior odds of 10 and a false discovery rate of 5%.

The vertical lines indicate the posterior odds (PO) threshold.

Locus 2: MSQ13; locus 8: QpZag110.
