# Supplementary material for: Population structure in Quercus suber L. revealed by nuclear microsatellite markers
Source: PeerJ journal article supplement (doi:10.7717/peerj.13565), 2022-06-16
Supplement: FIg_S3.pdf [file FIg_S3.pdf]

a)

## PCA 13 loci axes 1-2

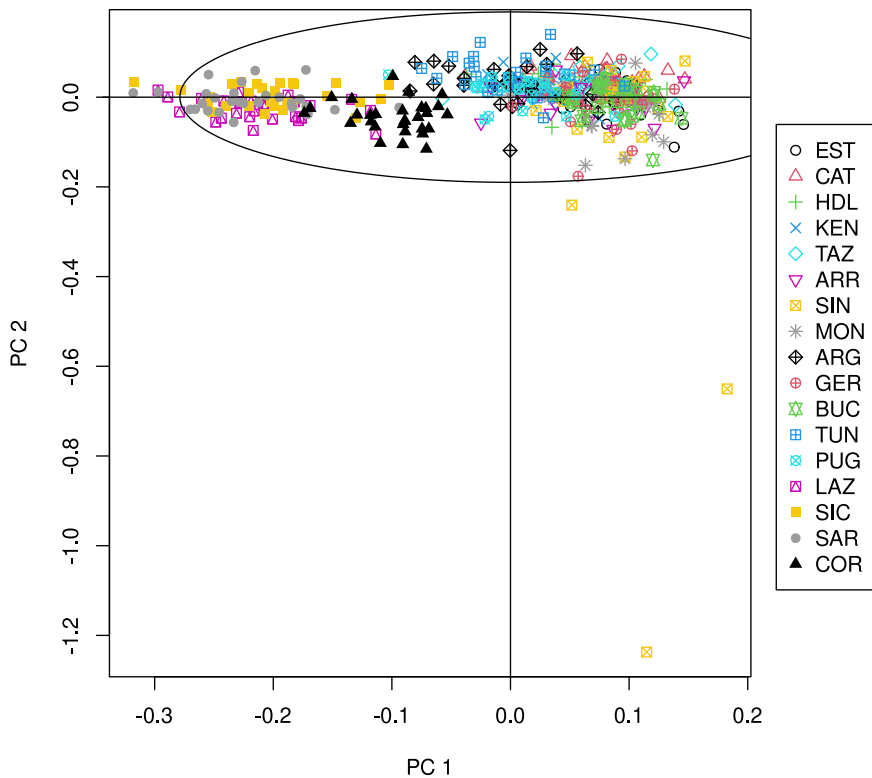

b)

## CA 13 loci axes 1-2

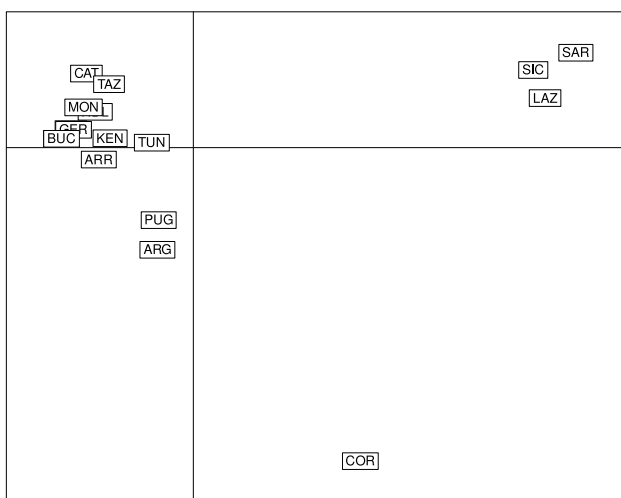

**Figure S3: PCA and CA of the 13 SSR loci data set.**

a) Principal components analysis (PCA) showing axes 1 and 2; PC1 and PC2 explain 6.34% of the variance (PC1:4.3%, PC2: 2.0%).

b) Correspondence analysis (CA) showing axes 1 and 2.

Population labels as shown in Table 2.
